# Supplementary material for: The Variation in Atmospheric Turbidity over a Tropical Site in Nigeria and Its Relation to Climate Drivers
Source: MDPI journal article supplement (doi:10.3390/atmos15030367), 2024-03-18
Supplement: s1 [file s1]

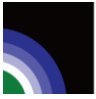

# The Variation in Atmospheric Turbidity Over a Tropical Site in Nigeria and its Relation to Climate Drivers

Olanrewaju Olukemi SoneyeArogundade <sup>1,2,\*</sup> and Bernhard Rappenglück <sup>1,2</sup>

<sup>1</sup> Department of Earth and Atmospheric Sciences, University of Houston, Houston, TX, 77204-5007, USA; brappenglueck@uh.edu

<sup>2</sup> Institute for Climate and Atmospheric Science, University of Houston, Houston, TX, 77204-5007, USA

\* Correspondence: olanrewaju.soneye@gmail.com or oosoneye@cougarnet.uh.edu

$G_0$  was estimated using the expression [1-4]:

$$G_0 = \frac{24 \times 3600}{\pi} \times I_0 \times E_{0SC} \times \left( \cos \phi \cos \delta + \frac{\pi h_s}{180} \sin \phi \sin \delta \right) \quad (S1)$$

where  $I_0$  is the solar constant with a value of  $1367 \frac{W}{m^2}$ ,  $h_s$  is the sunrise hour angle,  $\phi$  is the latitude of the measurement site, which is positively northward,  $\delta$  is the solar declination angle and  $\pi = 3.14286$ . The units of  $\Psi$ ,  $\phi$ ,  $\lambda_e$  and  $\delta$  are degrees ( $^\circ$ ).

The solar elevation angle was calculated using the expression:

$$\sin \Psi = \sin \phi \sin \delta + \cos \phi \cos \delta \cos h_s \quad (S2)$$

The solar declination angle, which represents the elevation of the sun above the equator at the time of observation, was calculated using the equation developed by [3-5]:

$$\delta = \phi_L \sin \left[ \frac{2\pi(d_j - d_0)}{d_a} \right] \quad (S3)$$

where  $\phi_L$  is the latitude of the Tropic of Cancer  $23.45^\circ$ ,  $\pi = 180^\circ$ ,  $d_j$  is the Julian day number of the year, which ranges from 1 on 1 January to 365 on 31 December,  $d_0$  is a constant = 284, and  $d_a$  is the average number of days per year with a value of 365.

The eccentricity correction factor was computed using ([1,3,4]:

$$E_{0SC} = 1.000110 + 0.034221 \cos \Gamma + 0.001280 \sin \Gamma + 0.000719 \cos 2\Gamma + 0.000077 \sin 2\Gamma \quad (S4)$$

where  $\Gamma$  (unit is degrees) is the day angle and can be expressed as:

$$\Gamma = \frac{360(d_j - 1)}{d_a} \quad (S5)$$

The sunrise hour angle was estimated using:

$$h_s = \cos^{-1}(-\tan \phi \tan \delta) \quad (S6)$$

The daily values of the diffuse solar radiation ( $G_f$ , unit  $\frac{W^2}{m}$ ) for the study area were calculated using equation (7) when  $h_s > 81.4^\circ$  and  $0.3 \leq C_{tAVG} \leq 0.8$  ([3,4]:

$$G_f = G_i (1.311 - 3.022CI_{AVG} + 3.427CI_{AVG}^2 - 1.821CI_{AVG}^3) \quad (S7)$$

where  $G_i$  is the measured incoming solar radiation ( $\frac{W^2}{m}$ ) and  $CI$  is the average value of the clearness index calculated using the mathematical expression:

$$CI = \frac{G_i}{G_0} \quad (S8)$$

The zenith angle was calculated using:

$$\theta = 90 - \Psi \quad (S9)$$

The auxiliary quantities and were using [6]:

$$b_1 = \frac{(f_0 + f_1 m_a)}{(1 + f_2 m_a)} \quad (S10)$$

$$f_0 = \frac{(1.6685 + 4.1257w + 0.018748w^2)}{(1 + 2.336w)} \quad (S11)$$

$$f_1 = \frac{(0.075379 + 0.066532w - 0.004263w^2)}{(1 + 1.9477w)} \quad (S12)$$

$$f_2 = \frac{(0.12867 + 0.24264w - 0.0087874w^2)}{(1 + 3.3566w)} \quad (S13)$$

$$b_2 = \frac{(j_0 + j_1 m_a + j_2 m_a^2)}{(1 + j_3 m_a^n)} \quad (S14)$$

$$j_0 = \frac{(-0.032335 - 0.0060424w)}{(1 + 0.023563w)} \quad (S15)$$

$$j_1 = \frac{(-0.38229 - 0.0009926w)}{(1 + 0.044137w^{0.594})} \quad (S16)$$

$$j_2 = \frac{(-0.0059467 - 0.0054054w)}{(1 + 0.91487w)} \quad (S17)$$

$$j_3 = \frac{(0.21989 + 0.041897w)}{(1 + 0.35717w)} \quad (S18)$$

$$n = \frac{(1.3211 + 2.2036w)}{(1 + 1.9367w)} \quad (S19)$$

The precipitable water content ( $w$ ) was estimated using [7]:

$$w = 0.493 \frac{RH}{T} \exp\left(26.23 - \frac{5416}{T}\right) \quad (S20)$$

where  $T$  is the temperature in Kelvin and  $RH$  the relative humidity in fractions of one. The unit of  $w$  is centimeter (cm)

$$C_A = \frac{G_{IM}}{G_{IC}} \quad (S21)$$

where  $G_{IM}$  is the measured incoming solar radiation at the surface and  $G_{IC}$  is the calculated incoming solar radiation under cloudless sky condition expressed by as:

$$\begin{cases} I_0 \tau_K \sin \Psi, & \Psi > 0 \\ 0, & \Psi < 0 \end{cases} \quad (S22)$$

where  $I_0$  is the solar constant =1367 W/m<sup>2</sup>,  $\Psi$  is the solar elevation angle between 0° and 90°, which is  $\geq 0$  and  $\leq 0$  for daytime and night-time conditions, respectively, and  $\tau_K$  is the atmospheric transmissivity expressed for clear sky conditions as  $\tau_K = 0.6 + 0.2 \sin \Psi$  by [8,9].

The statistical parameters for the Linke turbidity factor ( $T_L$ ), the calculated Ångström turbidity coefficient ( $\beta_{EST}$ ), Schüepp (SCH), and Unsworth–Monteith ( $K_{AUM}$ ) for January–December, 2016 at Ile-Ife, Nigeria is presented in Table S2. The standard deviation for the monthly average values of  $T_L$ ,  $\beta_{EST}$ , SCH, and  $K_{AUM}$  presented in this table vary between 0.04 and 2.21; 0.006 and 0.14; 0.015 and 0.15; and 0.02 and 0.11, respectively. These fluctuations are likely due to the short-term variations in air pollution or more unstable weather conditions, with the higher values recorded during the dry season and lower values recorded in the wet months. Notably, the minimum standard deviation values observed in the wet months indicate more stable atmospheric conditions during this season. The annual average values presented in this table for  $T_L$ ,  $\beta_{EST}$ , SCH, and  $K_{AUM}$  are  $39.79 \pm 9.36$ ,  $4.79 \pm 0.64$ ,  $5.14 \pm 0.77$ , and  $4.70 \pm 0.72$ , respectively, while they are 38.05, 4.81, 5.13, and 4.72 for the median, respectively. The monthly average values of  $T_L$ ,  $\beta_{EST}$ , SCH, and  $K_{AUM}$  presented in this table vary between 0.48 and 9.62, 0.20 and 0.60, 0.22

and 0.65, and 0.11 and 0.62 with the corresponding median values ranging from 0.47 and 9.21, 0.21 and 0.59, 0.23 and 0.63, and 0.11 and 0.62.

**Table S1.** List of sensors used in this study.

| Parameter                             | Device                                                                | Instrument (model and manufacturer)                                                                      | Accuracy <sup>1)</sup> , sampling time, and averaging Interval                                                                                                            |
|---------------------------------------|-----------------------------------------------------------------------|----------------------------------------------------------------------------------------------------------|---------------------------------------------------------------------------------------------------------------------------------------------------------------------------|
| Incoming Solar Radiation              | Pyranometer (4-Component Net Radiometer)                              | SR01 (NR01), Hukseflux, USA                                                                              | < 2.4% (solar radiation), < 7% (longwave radiation), 10 seconds, 1 minute                                                                                                 |
| Global Radiation                      | Pyranometer                                                           | CS300, Campbell Scientific, USA                                                                          | ±5% (for daily total radiation), 10 seconds, 1 minute                                                                                                                     |
| Aerosol Optical Depth                 | Sun Photometer                                                        | Calitoo, Tenum, France ( $\lambda_1 = 465$ nm, $\lambda_2 = 540$ nm, $\lambda_3 = 619$ nm) <sup>3)</sup> | $AOT_{AERONET} - AOT_{Calitoo}$ <sup>2)</sup> :<br>$\approx 0.4$ ( $\lambda_1 = 465$ nm, $\lambda_2 = 540$ nm)<br>$\approx 0.2$ ( $\lambda_3 = 619$ nm),<br>instantaneous |
| Wind Components                       | 3D Ultrasonic Anemometer                                              | CSAT3, Campbell Scientific, USA                                                                          | Horizontal wind speed: < ±8.0 cms <sup>-1</sup> ,<br>wind direction: ±0.7° at 1 m/s (for horizontal wind),<br>10 Hz, 30 min                                               |
| Air Temperature and Relative Humidity | Temperature (Pt resistance) and Relative Humidity (capacitance) Probe | HMP45C, Campbell Scientific, USA                                                                         | Temperature (t): <±0.3 °C (10°C < t < 40°C)<br>Relative humidity, (RH) at 20 °C:<br>± 2% (0 to 90% RH)<br>± 3% (90 to 100% RH),<br>10 seconds, 1 minute                   |

<sup>1)</sup> According to the manufacturers' manuals, if not noted otherwise.

<sup>2)</sup> According to <http://www.calitoo.fr/index.php?page=qualification-2> (accessed 15 December 2023).

<sup>3)</sup> with calibration factors:

$\lambda_1 = 465$  nm: CN0\_465 = 3787, Rayleigh\_465 = 0.19490, Ozone\_465 = 0.00000

$\lambda_2 = 540$  nm: CN0\_540 = 3368, Rayleigh\_540 = 0.10637, Ozone\_540 = 0.0128.

$\lambda_3 = 619$  nm: CN0\_619 = 2655, Rayleigh\_619 = 0.06281, Ozone\_619 = 0.0154

**Table S2.** Statistical parameters for the Linke turbidity factor ( $T_L$ ), the calculated Ångström turbidity coefficient ( $\beta_{EST}$ ), Schüepp (SCH), and Unsworth–Monteith ( $K_{AUM}$ ) for January–December, 2016 at Ile-Ife.

| Month    | $T_L$     |      |      |       |        | $\beta_{EST}$ |      |       |      |        | SCH  |      |      |      |        | $K_{AUM}$ |      |      |      |        |
|----------|-----------|------|------|-------|--------|---------------|------|-------|------|--------|------|------|------|------|--------|-----------|------|------|------|--------|
| s        | Mn        | Md   | Min  | Max   | CV (%) | Mn            | Md   | Min   | Max  | CV (%) | Mn   | Md   | Min  | Max  | CV (%) | Mn        | Md   | Min  | Max  | CV (%) |
| January  | 9.62±2.21 | 9.21 | 6.24 | 15.21 | 22.95  | 0.11          | 0.59 | 0.543 | 0.69 | 17.86  | 0.11 | 0.63 | 0.58 | 0.74 | 17.88  | ±0.10     | 0.59 | 0.53 | 0.66 | 16.51  |
| February | 4.13±0.90 | 4.04 | 2.82 | 7.31  | 21.80  | 0.07          | 0.52 | 0.386 | 0.67 | 12.43  | 0.08 | 0.56 | 0.41 | 0.72 | 14.70  | 0.07      | 0.46 | 0.4  | 0.64 | 15.09  |

|           |       |       |       |       |        |      |      |       |       |        |      |      |       |      |        |      |      |       |      |        |
|-----------|-------|-------|-------|-------|--------|------|------|-------|-------|--------|------|------|-------|------|--------|------|------|-------|------|--------|
|           | 3.07± |       |       |       | 0.39±  |      |      |       | 0.42± |        |      |      | 0.47± |      |        |      |      |       |      |        |
| March     | 0.52  | 3.01  | 2.52  | 5.54  | 17.00  | 0.06 | 0.40 | 0.287 | 0.53  | 15.87  | 0.07 | 0.43 | 0.31  | 0.57 | 16.42  | 0.06 | 0.46 | 0.40  | 0.63 | 12.99  |
|           | 2.91± |       |       |       | 0.37±  |      |      |       | 0.40± |        |      |      | 0.43± |      |        |      |      |       |      |        |
| April     | 0.73  | 3.02  | 1.87  | 5.42  | 24.92  | 0.04 | 0.37 | 0.354 | 0.42  | 9.68   | 0.07 | 0.39 | 0.38  | 0.45 | 16.75  | 0.06 | 0.45 | 0.34  | 0.54 | 12.82  |
|           | 1.06± |       |       |       | 0.34±  |      |      |       | 0.36± |        |      |      | 0.36± |      |        |      |      |       |      |        |
| May       | 0.25  | 1.08  | 0.52  | 1.65  | 23.94  | 0.03 | 0.34 | 0.299 | 0.41  | 9.81   | 0.04 | 0.36 | 0.32  | 0.44 | 9.81   | 0.05 | 0.37 | 0.22  | 0.49 | 12.98  |
|           | 0.67± |       |       |       | 0.30±  |      |      |       | 0.33± |        |      |      | 0.21± |      |        |      |      |       |      |        |
| June      | 0.11  | 0.63  | 0.52  | 0.93  | 17.08  | 0.03 | 0.32 | 0.234 | 0.34  | 10.25  | 0.04 | 0.34 | 0.25  | 0.37 | 11.39  | 0.04 | 0.21 | 0.09  | 0.38 | 18.61  |
|           | 0.59± |       |       |       | 0.23±  |      |      |       | 0.26± |        |      |      | 0.15± |      |        |      |      |       |      |        |
| July      | 0.10  | 0.58  | 0.44  | 0.81  | 17.14  | 0.01 | 0.21 | 0.084 | 0.38  | 6.35   | 0.03 | 0.24 | 0.004 | 0.82 | 12.77  | 0.03 | 0.14 | 0.002 | 0.35 | 20.28  |
|           | 0.48± |       |       |       | 0.20±  |      |      |       | 0.22± |        |      |      | 0.11± |      |        |      |      |       |      |        |
| August    | 0.04  | 0.47  | 0.41  | 0.66  | 8.74   | 0.01 | 0.22 | 0.023 | 0.34  | 3.09   | 0.02 | 0.23 | 0.02  | 0.36 | 7.07   | 0.02 | 0.11 | 0.01  | 0.20 | 18.06  |
|           | 2.09± |       |       |       | 0.35±  |      |      |       | 0.37± |        |      |      | 0.39± |      |        |      |      |       |      |        |
| September | 0.44  | 2.08  | 1.35  | 2.92  | 21.22  | 0.03 | 0.35 | 0.349 | 0.35  | 9.93   | 0.04 | 0.37 | 0.37  | 0.37 | 9.86   | 0.06 | 0.40 | 0.31  | 0.47 | 14.39  |
|           | 1.39± |       |       |       | 0.35±  |      |      |       | 0.37± |        |      |      | 0.36± |      |        |      |      |       |      |        |
| October   | 0.45  | 1.29  | 0.82  | 2.54  | 32.25  | 0.03 | 0.35 | 0.340 | 0.37  | 9.80   | 0.04 | 0.37 | 0.36  | 0.39 | 10.33  | 0.06 | 0.37 | 0.19  | 0.61 | 17.41  |
|           | 5.52± |       |       |       | 0.54±  |      |      |       | 0.58± |        |      |      | 0.54± |      |        |      |      |       |      |        |
| November  | 1.44  | 5.15  | 3.21  | 10.14 | 26.18  | 0.08 | 0.55 | 0.477 | 0.59  | 14.16  | 0.10 | 0.58 | 0.51  | 0.64 | 16.94  | 0.08 | 0.54 | 0.49  | 0.62 | 14.45  |
|           | 8.26± |       |       |       | 0.60±  |      |      |       | 0.64± |        |      |      | 0.62± |      |        |      |      |       |      |        |
| December  | 2.16  | 7.49  | 5.52  | 14.00 | 26.09  | 0.14 | 0.59 | 0.555 | 0.70  | 22.59  | 0.15 | 0.63 | 0.59  | 0.74 | 22.63  | 0.11 | 0.62 | 0.59  | 0.67 | 17.16  |
|           | 39.79 |       |       |       | 4.79   |      |      |       | 5.14  |        |      |      | 4.70  |      |        |      |      |       |      |        |
| Annual    | ±     | 38.05 | 26.24 | 67.13 | 259.31 | ±    | 4.81 | 3.93  | 5.79  | 141.82 | ±    | 5.13 | 4.10  | 6.61 | 166.56 | ±    | 4.72 | 3.57  | 6.26 | 190.76 |
|           | 9.36  |       |       |       | 0.64   |      |      |       | 0.77  |        |      |      | 0.72  |      |        |      |      |       |      |        |

Mn—Arithmetic Mean, Md—Median, Min—Minimum, Max—Maximum, CV—Coefficient of Variation. The frequency distribution of the atmospheric turbidity coefficients values at different categories are presented in Table S3. For the Linke turbidity factor, the distribution in the dry season was 1.7 % for values < 2.5, 29.8 % for the range of 3.5 to 4.5, and 68.6 % for values ≥ 5.5. In the wet season, the distribution was 45.7 % for values below 2.5, 11.8 % for the range of 3.5 to 4.5, and 0.8 % for values ≥ 5.5. For the entire year, the distribution of  $T_L$  was 59.0 % for values below 2.5, 1.7 % for the range of 3.5 to 4.5, and 23.2 % for values ≥ 5.5. Notably, all the frequency distributions for the calculated Ångström turbidity coefficient were 0.0 % 26.1 %, and 17.5 % for values < 0.3 in the dry season, wet season, and annual, respectively. However, for values above 0.3, the distribution of  $\beta_{EST}$  is 100.0 %, 73.9 %, and 82.5 % in the dry season, wet season and annual, respectively. Similarly, all the frequency distributions for SCH were 0.0%, 21.6 %, and 14.5 % for values below 0.3, and 100.0 %, 78.4 %, and 85.5 % for values above 0.3 in the dry season, wet season, and annual, respectively. For  $K_{AUM}$ , the distribution was 0.0 %, 43.1 %, and 28.9 % for values below 0.3, and 100.0 %, 56.9 %, and 71.1 % for values above 0.3 in the dry season, wet season, and annual, respectively. These results

highlight that the atmospheric turbidity levels are generally higher during the dry season at the study site compared to the wet season.

**Table S3.** Frequency distribution of atmospheric turbidity coefficients values broken down into different categories for January–December, 2016 at Ile-Ife.

| Frequency Distribution  | Dry Season (%) | Wet Season (%) | Annual (%) |
|-------------------------|----------------|----------------|------------|
| $T_L \leq 2.5$          | 1.7            | 45.7           | 59.0       |
| $3.5 \leq T_L \leq 4.5$ | 29.8           | 11.8           | 1.7        |
| $T_L \geq 5.5$          | 68.6           | 0.8            | 23.2       |
| $\beta_{EST} < 0.3$     | 0.0            | 26.1           | 17.5       |
| $\beta_{EST} > 0.3$     | 100.0          | 73.9           | 82.5       |
| $SCH < 0.3$             | 0.0            | 21.6           | 14.5       |
| $SCH > 0.3$             | 100.0          | 78.4           | 85.5       |
| $K_{AUM} < 0.3$         | 0.0            | 43.1           | 28.9       |
| $K_{AUM} > 0.3$         | 100.0          | 56.9           | 71.1       |

**Table S4.** Monthly mean values of sunshine duration  $R_s$ , air temperature  $T_A$ , relative humidity RH, water vapor pressure  $e_v$ , and precipitable water content  $w$  in Ile-Ife.

| Months    | $R_s$ (hr) | $T_A$ ( $^{\circ}\text{C}$ ) | RH (%) | $e_v$ (hPa) | $w$ (cm) |
|-----------|------------|------------------------------|--------|-------------|----------|
| January   | 6.0        | 28.2                         | 61.4   | 19.1        | 3.4      |
| February  | 5.7        | 28.2                         | 61.1   | 22.1        | 3.6      |
| March     | 5.9        | 28.2                         | 73.3   | 25.6        | 4.6      |
| April     | 6.6        | 27.0                         | 78.9   | 26.8        | 4.8      |
| May       | 5.4        | 25.8                         | 81.5   | 27.2        | 4.8      |
| June      | 4.9        | 25.4                         | 83.7   | 27.5        | 4.3      |
| July      | 3.3        | 24.9                         | 85.0   | 30.1        | 4.4      |
| August    | 2.0        | 24.4                         | 85.0   | 28.9        | 4.2      |
| September | 4.2        | 25.4                         | 83.9   | 27.6        | 4.4      |
| October   | 5.7        | 25.8                         | 79.4   | 27.0        | 4.3      |
| November  | 6.6        | 27.4                         | 76.1   | 26.3        | 4.4      |
| December  | 5.9        | 26.9                         | 75.4   | 25.6        | 4.4      |

## References

1. Iqbal, M. *An Introduction to Solar Radiation*; Academic Press: New York, NY, USA, 1983.
2. Li, D.H.W.; Lam, J.C. A Study of Atmospheric Turbidity for Hong Kong. *Renew. Energy* **2002**, *25*, 1–13. [https://doi.org/10.1016/S0960-1481\(01\)00008-8](https://doi.org/10.1016/S0960-1481(01)00008-8)
3. Soneye, O.O. Evaluation of clearness index and cloudiness index using measured global solar radiation data: A case study for a tropical climatic region of Nigeria. *Atmósfera* **2021**, *34*, 25–39. <https://doi.org/10.20937/ATM.52796>.
4. Soneye-Arogundade, O.O.; Rappenglück, B. Estimation of Diffuse Solar Radiation Models for a Tropical Site in Nigeria. *Pure Appl. Geophys.* **2023**, *180*, 3385–3400. <https://doi.org/10.1007/s00024-023-03330-x>.
5. Gueymard, C.A. Turbidity determination from broadband irradiance measurements: A detailed multi-coefficient approach. *J. Appl. Meteorol. Climatol.* **1998**, *37*, 414–435.
6. Chaâbane, M. Analysis of the atmospheric turbidity levels at two Tunisian sites. *Atmos. Res.* **2008**, *87*, 136–146. <https://doi.org/10.1016/j.atmosres.2007.08.003>.
7. Djelloul, D.; Abdanour, I.; Philippe, K.; Mohamed, Z.; Mustapha, M. Investigation of atmospheric turbidity at Ghadaa (Algeria) using both ground solar irradiance measurements and space data. *Atmos. Clim. Sci.* **2019**, *9*, 114–134. <https://doi.org/10.4236/acs.2019.91008>.
8. Jegede, O.O.; Ogolo, E.O.; Aregbesola, T.O. Estimating net radiation using routine meteorological data at a tropical location in Nigeria. *Int. J. Sustain. Energy* **2006**, *25*, 107–115. <https://doi.org/10.1080/14786450600593261>.

9. Soneye-Arogundade, O.O. Evaluation and calibration of downward longwave radiation models under cloudless sky at Ile-Ife, Nigeria. *Atmósfera* **2021**, *34*, 417–432. <https://doi.org/10.20937/ATM.52843>.
